# Supplementary material
Source: PubMed Central journal article supplement (PMC2665305)
Supplement: NIHMS86455-supplement-1_si_001.pdf [file NIHMS86455-supplement-1_si_001.pdf]

## Charmm force field parameters for paromomycin

Charmm force field parameters<sup>1,2</sup> for paromomycin were combined from already existing parameters for sugar rings (`par_all122_prot.inp` Charmm file), lipids, amino alcohols (`par_all122_lipid.inp` Charmm file), and ribose (`par_all127_na.prm` Charmm file). Paromomycin was assumed in a fully protonated state, carrying a total charge of  $+5e$  due to its five amino groups. Atomic partial charges were determined as ESP charges for paromomycin minimized using MP2 method and 6-31G\* basis set. Necessary calculations were carried out with the Gaussian package<sup>3</sup>. The complete parameter set and Charmm topology files are listed below.

In order to evaluate the validity of the obtained parameters, an MD simulation of paromomycin in a box of 1600 TIP3P<sup>4</sup> water molecules was performed, and results were compared with the available experimental data. The system was neutralized with five  $\text{Cl}^-$  ions. Furthermore, four  $\text{Na}^+$ , and four  $\text{Cl}^-$  ions were added to mimic intracellular salt concentration of 150 mmol per liter. Simulations, corresponding to NPT ensemble with periodic boundary conditions, were performed with the use of NAMD package<sup>5</sup>. Electrostatic interactions were calculated using the Particle Mesh Ewald<sup>6</sup> summation method. The SHAKE<sup>7</sup> algorithm was applied for bonds involving hydrogen atoms, allowing for a time step of 2 fs. The collected data correspond to 300 ps production phase.

From the obtained trajectory several inter-proton distances, and distribution of  $\phi/\Psi$  angles for sugar linkages were extracted. Their comparison with experimental NMR data obtained for neomycin<sup>8</sup> (apart from one 6' amino group, neomycin is identical to paromomycin) is presented in Table 1. To compare the MD derived  $\phi/\Psi$  graphs (Figure 1) with the NMR data see the original paper<sup>8</sup>.

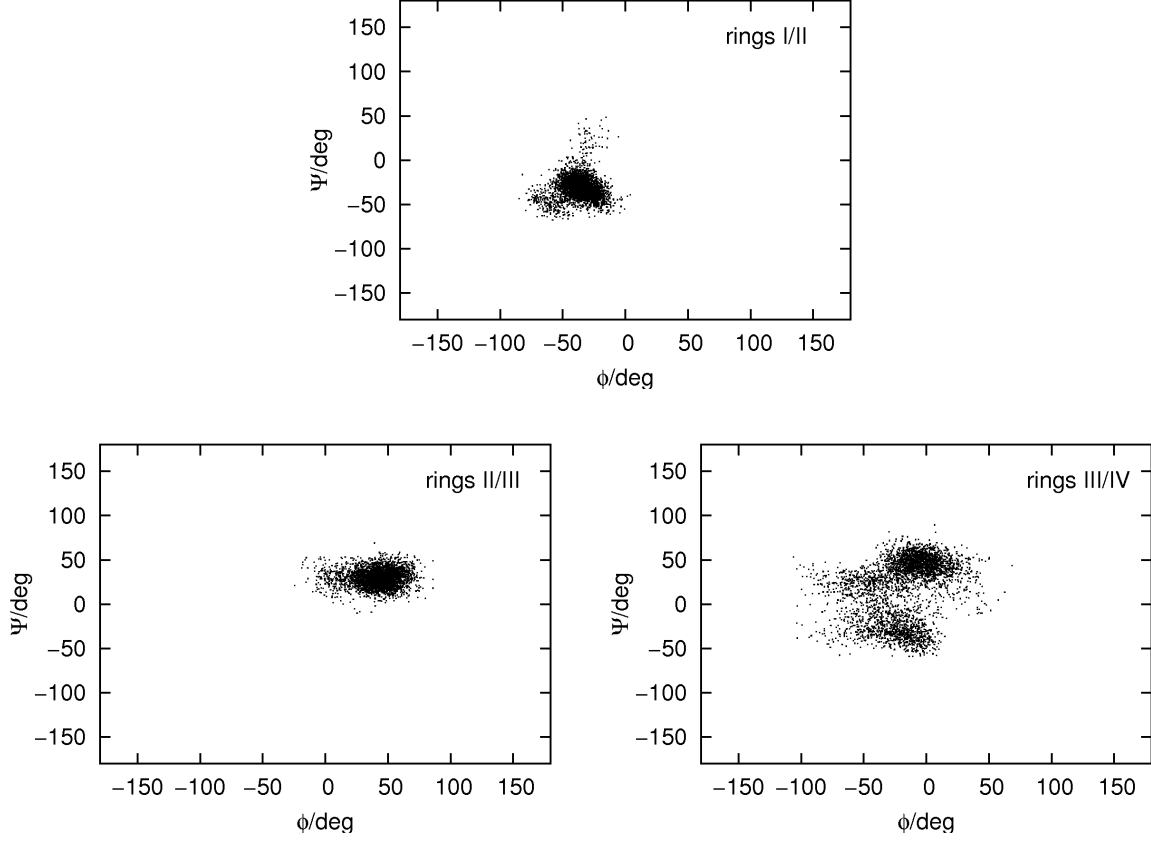

Figure 1: Distributions of  $\phi$  and  $\Psi$  angles for paromomycin sugar linkages obtained from MD simulation, showing good agreement with experimental data<sup>8</sup>.

| protons   | $d_{sym}[\text{\AA}]$ | $d_{exp}[\text{\AA}]$ |
|-----------|-----------------------|-----------------------|
| H11 – H33 | 4.15(0.24)            | >3.5                  |
| H11 – H24 | 2.28(0.22)            | 2.5                   |
| H11 – H25 | 3.29(0.24)            | 3.0                   |
| H11 – H35 | 4.45(0.63)            | 3.0                   |
| H11 – H32 | 3.34(0.35)            | 3.6                   |
| H11 – H34 | 4.15(0.24)            | >3.5                  |
| H31 – H24 | 4.50(0.11)            | >4.0                  |
| H31 – H25 | 2.57(0.23)            | 2.3                   |
| H31 – H26 | 3.38(0.26)            | 3.6                   |
| H32 – H26 | 4.58(0.29)            | 3.3                   |
| H31 – H34 | 3.26(0.21)            | 3.2                   |
| H41 – H33 | 2.33(0.22)            | 2.6                   |
| H41 – H32 | 4.31(0.33)            | 3.1                   |
| H41 – H34 | 3.96(0.67)            | 3.9                   |

Table 1: Simulated (paromomycin) and NMR<sup>8</sup> (neomycin) inter-proton distances.

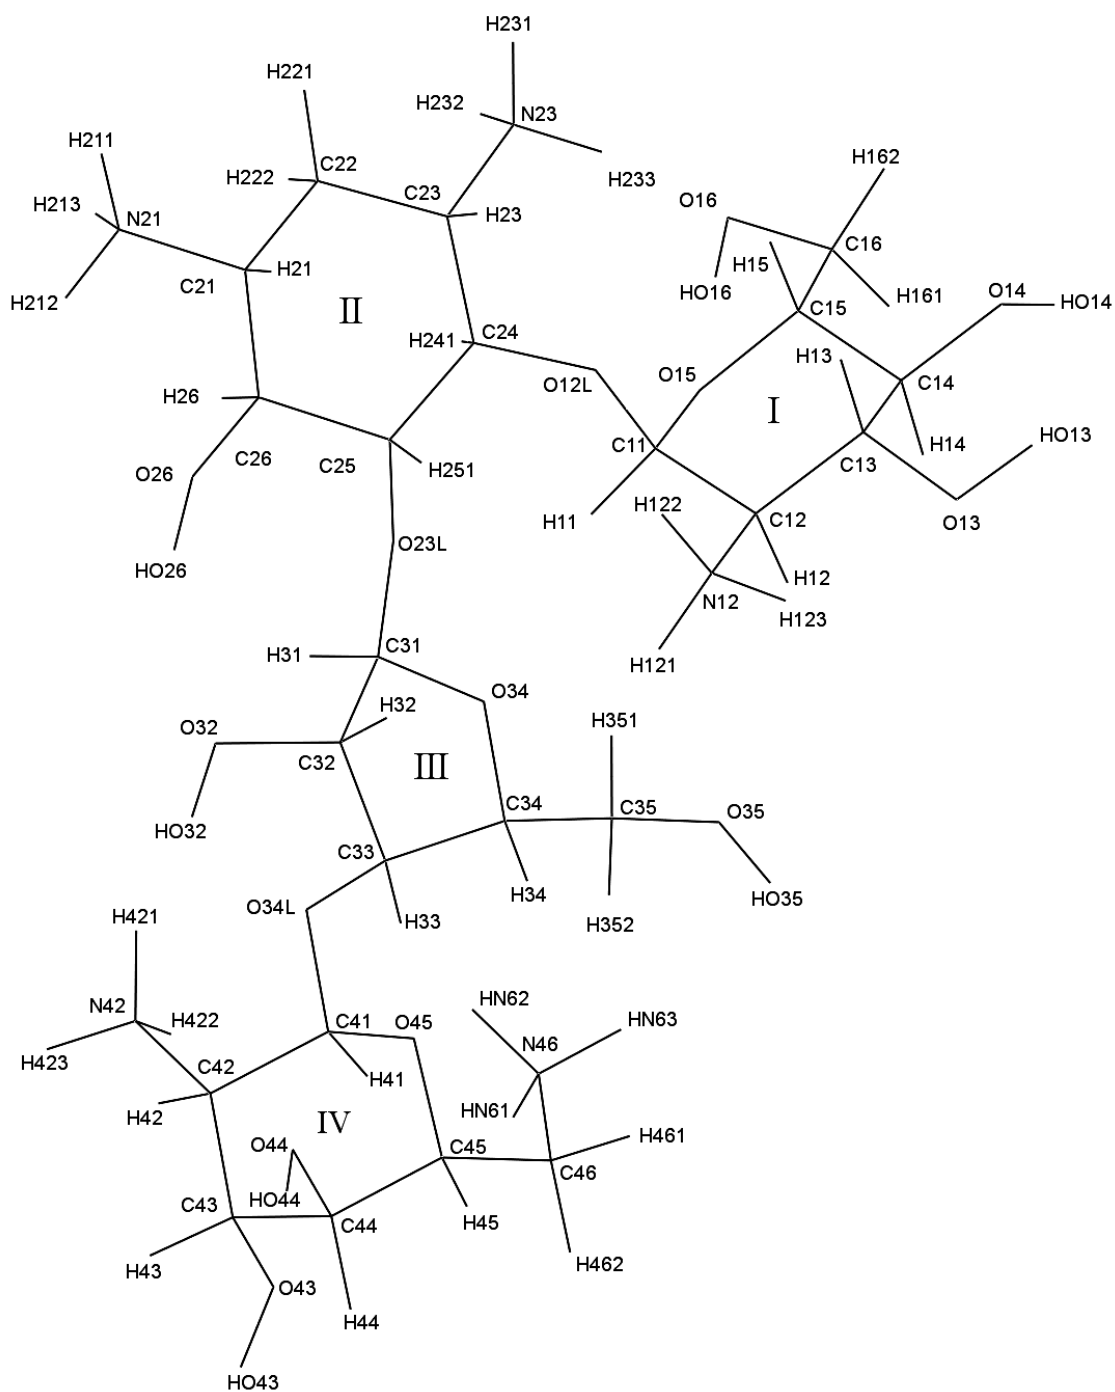

Figure 2: Numbering of paromomycin atoms, as they appear in the Charmm topology file.

Charmm topology file for paromomycin with all its amino groups ionized (a total charge of +5e). For atom numbering see Figure 2.

\*>>>>> CHARMM topology file <<<<<<

27 1

|      |     |      |          |   |
|------|-----|------|----------|---|
| MASS | 9   | HN5  | 1.00800  | H |
| MASS | 11  | HN7  | 1.00800  | H |
| MASS | 12  | HN8  | 1.00800  | H |
| MASS | 33  | CN7  | 12.01100 | C |
| MASS | 34  | CN7B | 12.01100 | C |
| MASS | 37  | CN8  | 12.01100 | C |
| MASS | 38  | CN8B | 12.01100 | C |
| MASS | 76  | ON5  | 15.99900 | O |
| MASS | 78  | ON6B | 15.99900 | O |
| MASS | 201 | HCL  | 1.00800  | H |
| MASS | 202 | HAS  | 1.00800  | H |
| MASS | 203 | HOS  | 1.00800  | H |
| MASS | 211 | CTS  | 12.01100 | C |
| MASS | 221 | ON5P | 15.99900 | O |
| MASS | 222 | OHS  | 15.99900 | O |
| MASS | 223 | OES  | 15.99900 | O |
| MASS | 231 | NH3L | 14.00700 | N |

AUTO ANGLES DIHE

RESI PARO 5.00

|           |      |       |
|-----------|------|-------|
| ATOM C21  | CN8  | 0.44  |
| ATOM H21  | HN8  | 0.12  |
| ATOM N21  | NH3L | -0.77 |
| ATOM H211 | HCL  | 0.45  |
| ATOM H212 | HCL  | 0.45  |
| ATOM H213 | HCL  | 0.45  |
| ATOM C22  | CN7  | -0.70 |
| ATOM H221 | HN7  | 0.24  |
| ATOM H222 | HN7  | 0.23  |
| ATOM C23  | CN8  | 0.32  |
| ATOM H23  | HN8  | 0.11  |
| ATOM N23  | NH3L | -0.64 |
| ATOM H231 | HCL  | 0.42  |
| ATOM H232 | HCL  | 0.42  |
| ATOM H233 | HCL  | 0.42  |
| ATOM C24  | CN7  | 0.10  |
| ATOM H241 | HN7  | 0.15  |
| ATOM C25  | CN8  | -0.06 |
| ATOM H251 | HN8  | 0.14  |
| ATOM C26  | CN7  | 0.05  |
| ATOM H26  | HN7  | 0.12  |
| ATOM O26  | ON5P | -0.63 |

|      |      |      |       |
|------|------|------|-------|
| ATOM | HO26 | HN5  | 0.48  |
| ATOM | O12L | ON5P | -0.46 |
| ATOM | C11  | CTS  | 0.32  |
| ATOM | H11  | HAS  | 0.14  |
| ATOM | C15  | CTS  | 0.03  |
| ATOM | H15  | HAS  | 0.05  |
| ATOM | O15  | OES  | -0.46 |
| ATOM | C12  | CTS  | -0.10 |
| ATOM | H12  | HAS  | 0.18  |
| ATOM | N12  | NH3L | -1.04 |
| ATOM | H121 | HCL  | 0.53  |
| ATOM | H122 | HCL  | 0.53  |
| ATOM | H123 | HCL  | 0.53  |
| ATOM | C13  | CTS  | 0.57  |
| ATOM | H13  | HAS  | 0.00  |
| ATOM | O13  | OHS  | -0.63 |
| ATOM | HO13 | HOS  | 0.45  |
| ATOM | C14  | CTS  | -0.03 |
| ATOM | H14  | HAS  | 0.12  |
| ATOM | O14  | OHS  | -0.59 |
| ATOM | HO14 | HOS  | 0.46  |
| ATOM | C16  | CTS  | 0.36  |
| ATOM | H161 | HAS  | 0.01  |
| ATOM | H162 | HAS  | 0.07  |
| ATOM | O16  | OHS  | -0.68 |
| ATOM | HO16 | HOS  | 0.45  |
| ATOM | O23L | ON5P | -0.45 |
| ATOM | C34  | CN7  | 0.32  |
| ATOM | H34  | HN7  | 0.11  |
| ATOM | O34  | ON6B | -0.64 |
| ATOM | C31  | CN7B | 0.67  |
| ATOM | H31  | HN7  | 0.04  |
| ATOM | C32  | CN7B | 0.16  |
| ATOM | H32  | HN7  | 0.09  |
| ATOM | O32  | ON5  | -0.66 |
| ATOM | HO32 | HN5  | 0.50  |
| ATOM | C33  | CN7  | -0.27 |
| ATOM | H33  | HN7  | 0.19  |
| ATOM | HO35 | HN5  | 0.48  |
| ATOM | O35  | ON5  | -0.66 |
| ATOM | C35  | CN8B | 0.05  |
| ATOM | H351 | HN8  | 0.03  |
| ATOM | H352 | HN8  | 0.08  |
| ATOM | O34L | ON5P | -0.39 |
| ATOM | C41  | CTS  | 0.49  |
| ATOM | H41  | HAS  | 0.04  |
| ATOM | C45  | CTS  | -0.16 |
| ATOM | H45  | HAS  | 0.19  |

|      |      |      |       |
|------|------|------|-------|
| ATOM | O45  | OES  | -0.34 |
| ATOM | C42  | CTS  | 0.06  |
| ATOM | H42  | HAS  | 0.13  |
| ATOM | N42  | NH3L | -0.55 |
| ATOM | H421 | HCL  | 0.38  |
| ATOM | H422 | HCL  | 0.38  |
| ATOM | H423 | HCL  | 0.38  |
| ATOM | C43  | CTS  | 0.06  |
| ATOM | H43  | HAS  | 0.13  |
| ATOM | O43  | OHS  | -0.63 |
| ATOM | HO43 | HOS  | 0.49  |
| ATOM | C44  | CTS  | 0.17  |
| ATOM | H44  | HAS  | 0.15  |
| ATOM | O44  | OHS  | -0.62 |
| ATOM | HO44 | HOS  | 0.46  |
| ATOM | C46  | CTS  | 0.12  |
| ATOM | H461 | HAS  | 0.11  |
| ATOM | H462 | HAS  | 0.15  |
| ATOM | N46  | NH3L | -0.56 |
| ATOM | HN61 | HCL  | 0.40  |
| ATOM | HN62 | HCL  | 0.40  |
| ATOM | HN63 | HCL  | 0.40  |

|      |     |      |     |      |     |      |     |      |
|------|-----|------|-----|------|-----|------|-----|------|
| BOND | C21 | C22  | C22 | C23  | C23 | C24  | N46 | HN62 |
| BOND | C21 | H21  | C22 | H221 | C22 | H222 | N42 | H423 |
| BOND | C23 | H23  | C24 | H241 | N21 | H213 |     |      |
| BOND | C25 | H251 | C24 | C25  | N23 | H233 |     |      |
| BOND | C26 | H26  | C26 | O26  | O26 | HO26 |     |      |
| BOND | C21 | N21  | N21 | H211 | N21 | H212 |     |      |
| BOND | C23 | N23  | N23 | H231 | N23 | H232 |     |      |
| BOND | C25 | O23L | C25 | C26  | C12 | C11  |     |      |
| BOND | C24 | O12L | C26 | C21  | C14 | O14  |     |      |
| BOND | C11 | O12L | C11 | H11  | C11 | O15  |     |      |
| BOND | C12 | H12  | C12 | C13  | C13 | H13  |     |      |
| BOND | C13 | O13  | O13 | HO13 | C13 | C14  |     |      |
| BOND | O14 | HO14 | C14 | C15  | C15 | H15  |     |      |
| BOND | C16 | H161 | C16 | O16  | O16 | HO16 |     |      |
| BOND | C12 | N12  | N12 | H121 | N12 | H122 |     |      |
| BOND | C31 | O23L | C14 | H14  | C34 | O34  |     |      |
| BOND | C31 | C32  | C32 | C33  | C33 | C34  |     |      |
| BOND | C31 | H31  | C15 | C16  | C35 | H352 |     |      |
| BOND | C32 | O32  | O32 | HO32 | C32 | H32  |     |      |
| BOND | C33 | H33  | C16 | H162 | C44 | O44  |     |      |
| BOND | C34 | H34  | C34 | C35  | C46 | H462 |     |      |
| BOND | C35 | O35  | O35 | HO35 | C35 | H351 |     |      |
| BOND | C33 | O34L | C15 | O15  | N46 | HN63 |     |      |
| BOND | C41 | O34L | N12 | H123 | C44 | H44  |     |      |
| BOND | C41 | H41  | C41 | O45  | C41 | C42  |     |      |

|      |     |      |     |      |     |      |
|------|-----|------|-----|------|-----|------|
| BOND | C42 | H42  | C42 | C43  | C43 | H43  |
| BOND | C43 | O43  | O43 | HO43 | C43 | C44  |
| BOND | O44 | HO44 | C44 | C45  | C45 | H45  |
| BOND | C46 | H461 | C46 | N46  | N46 | HN61 |
| BOND | C45 | O45  | O34 | C31  | C45 | C46  |
| BOND | C42 | N42  | N42 | H421 | N42 | H422 |

Force field parameters used for paromomycin, with standard Charmm potential energy terms.

#### ATOM PROPERTIES

| #   | ATOM | N (EFF) | RADIUS |
|-----|------|---------|--------|
| 9   | HN5  | -0.0460 | 0.2245 |
| 11  | HN7  | -0.0220 | 1.3200 |
| 12  | HN8  | -0.0280 | 1.3400 |
| 33  | CN7  | -0.0200 | 2.2750 |
| 34  | CN7B | -0.0200 | 2.2750 |
| 37  | CN8  | -0.0560 | 2.0100 |
| 38  | CN8B | -0.0560 | 2.0100 |
| 76  | ON5  | -0.1521 | 1.7700 |
| 78  | ON6B | -0.1521 | 1.7700 |
| 201 | HCL  | -0.0460 | 0.2245 |
| 202 | HAS  | -0.0220 | 1.3200 |
| 203 | HOS  | -0.0460 | 0.2245 |
| 211 | CTS  | -0.0200 | 2.2750 |
| 221 | ON5P | -0.1521 | 1.7700 |
| 222 | OHS  | -0.1521 | 1.7700 |
| 223 | OES  | -0.1521 | 1.7700 |
| 231 | NH3L | -0.2000 | 1.8500 |

#### BOND PARAMETERS

!V(bond) = Kb(b - b0)\*\*2

!Kb: kcal/mole/A\*\*2

!b0: A

| #  | BOND        | Kb    | b0    |
|----|-------------|-------|-------|
| 1  | CN7 - HN7   | 309.0 | 1.111 |
| 2  | CN7 - CN7   | 222.5 | 1.529 |
| 3  | CN7B - HN7  | 309.0 | 1.111 |
| 4  | CN7B - CN7  | 222.5 | 1.460 |
| 5  | CN7B - CN7B | 200.0 | 1.450 |
| 6  | CN8 - HN8   | 309.0 | 1.111 |
| 7  | CN8 - CN7   | 222.5 | 1.516 |
| 10 | CN8B - HN8  | 309.0 | 1.111 |
| 11 | CN8B - CN7  | 222.5 | 1.512 |
| 13 | ON5 - HN5   | 545.0 | 0.960 |
| 15 | ON5 - CN7B  | 428.0 | 1.400 |

|    |      |   |      |       |       |
|----|------|---|------|-------|-------|
| 17 | ON5  | - | CN8B | 428.0 | 1.420 |
| 18 | ON6B | - | CN7  | 240.0 | 1.480 |
| 19 | ON6B | - | CN7B | 260.0 | 1.420 |
| 20 | CTS  | - | HAS  | 335.6 | 1.100 |
| 21 | CTS  | - | CTS  | 325.5 | 1.507 |
| 22 | ON5P | - | HN5  | 545.0 | 0.960 |
| 23 | ON5P | - | CN7  | 385.3 | 1.417 |
| 24 | ON5P | - | CN7B | 385.3 | 1.417 |
| 25 | ON5P | - | CN8  | 385.3 | 1.417 |
| 26 | ON5P | - | CTS  | 385.3 | 1.417 |
| 27 | OHS  | - | HOS  | 546.4 | 0.960 |
| 28 | OHS  | - | CTS  | 384.1 | 1.407 |
| 29 | OES  | - | CTS  | 385.3 | 1.417 |
| 30 | NH3L | - | CN8  | 261.0 | 1.510 |
| 31 | NH3L | - | HCL  | 410.0 | 1.040 |
| 32 | NH3L | - | CTS  | 261.0 | 1.510 |

BOND ANGLE PARAMETERS

!V(angle) = Kt (Theta - T0)\*\*2

!Kt: kcal/mole/rad\*\*2

!T0: degrees

| #  | A N G L E |   |             | Kt     | T0       |
|----|-----------|---|-------------|--------|----------|
| 1  | HN7       | - | CN7 - HN7   | 35.50  | 109.0000 |
| 4  | HN8       | - | CN8B - HN8  | 35.50  | 109.0000 |
| 6  | CN7       | - | ON5P - HN5  | 57.55  | 109.1722 |
| 7  | CN7       | - | CN7 - HN7   | 40.00  | 108.0000 |
| 8  | CN7       | - | CN7B - HN7  | 34.53  | 110.1000 |
| 9  | CN7       | - | CN8 - HN8   | 34.53  | 110.1000 |
| 10 | CN7       | - | CN8B - HN8  | 34.53  | 110.1000 |
| 11 | CN7       | - | CN8 - CN7   | 58.35  | 113.6000 |
| 12 | CN7B      | - | ON5 - HN5   | 57.50  | 109.0000 |
| 13 | CN7B      | - | CN7 - HN7   | 34.53  | 110.1000 |
| 14 | CN7B      | - | CN7B - HN7  | 33.40  | 110.1000 |
| 16 | CN7B      | - | CN7 - CN7   | 60.00  | 100.0000 |
| 17 | CN7B      | - | CN7B - CN7  | 110.00 | 96.0000  |
| 19 | CN7B      | - | ON6B - CN7  | 110.00 | 115.0000 |
| 21 | CN8       | - | CN7 - HN7   | 34.50  | 110.1000 |
| 29 | CN8       | - | ON5P - CN7B | 92.59  | 111.5092 |
| 30 | CN8       | - | CN7 - CN8   | 58.35  | 113.6000 |
| 32 | CN8B      | - | ON5 - HN5   | 57.50  | 106.0000 |
| 33 | CN8B      | - | CN7 - HN7   | 34.50  | 110.1000 |
| 35 | CN8B      | - | CN7 - CN7   | 45.00  | 110.0000 |
| 39 | ON5       | - | CN7B - HN7  | 60.00  | 109.5000 |
| 41 | ON5       | - | CN8B - HN8  | 45.90  | 108.8900 |
| 43 | ON5       | - | CN7B - CN7  | 90.00  | 108.0000 |
| 45 | ON5       | - | CN8B - CN7  | 75.70  | 110.1000 |
| 47 | ON5       | - | CN7B - CN7B | 80.00  | 108.4000 |
| 50 | ON6B      | - | CN7 - HN7   | 45.20  | 107.2400 |



|    |      |   |      |   |      |        |          |
|----|------|---|------|---|------|--------|----------|
| 51 | ON6B | - | CN7B | - | HN7  | 45.20  | 107.2400 |
| 52 | ON6B | - | CN7  | - | CN7  | 100.00 | 110.0000 |
| 53 | ON6B | - | CN7B | - | CN7B | 90.00  | 106.0000 |
| 55 | ON6B | - | CN7  | - | CN8B | 90.00  | 108.2000 |
| 56 | HCL  | - | NH3L | - | CN8  | 33.00  | 109.5000 |
| 57 | HCL  | - | NH3L | - | HCL  | 41.00  | 109.5000 |
| 58 | HAS  | - | CTS  | - | HAS  | 36.82  | 106.1784 |
| 59 | CTS  | - | ON5P | - | CN7  | 92.59  | 111.5092 |
| 60 | CTS  | - | NH3L | - | HCL  | 33.00  | 109.5000 |
| 61 | CTS  | - | CTS  | - | HAS  | 42.91  | 109.7502 |
| 62 | CTS  | - | OHS  | - | HOS  | 57.55  | 109.1722 |
| 63 | CTS  | - | CTS  | - | CTS  | 167.35 | 110.6156 |
| 64 | CTS  | - | OES  | - | CTS  | 92.59  | 111.5092 |
| 65 | ON5P | - | CN7  | - | HN7  | 52.51  | 109.3850 |
| 66 | ON5P | - | CN7B | - | HN7  | 52.51  | 109.3850 |
| 67 | ON5P | - | CN8  | - | HN8  | 52.51  | 109.3850 |
| 68 | ON5P | - | CN7  | - | CN7  | 112.21 | 107.6019 |
| 69 | ON5P | - | CN8  | - | CN7  | 112.21 | 107.6019 |
| 70 | ON5P | - | CN7  | - | CN7B | 112.21 | 107.6019 |
| 71 | ON5P | - | CN7B | - | CN7B | 112.21 | 107.6019 |
| 72 | ON5P | - | CN7  | - | CN8  | 112.21 | 107.6019 |
| 73 | ON5P | - | CN7B | - | ON6B | 37.44  | 112.1882 |
| 74 | ON5P | - | CTS  | - | HAS  | 62.25  | 106.4025 |
| 75 | ON5P | - | CTS  | - | CTS  | 169.03 | 108.3759 |
| 76 | OHS  | - | CTS  | - | HAS  | 52.51  | 109.3850 |
| 77 | OHS  | - | CTS  | - | CTS  | 112.21 | 107.6019 |
| 78 | OES  | - | CTS  | - | HAS  | 62.25  | 106.4025 |
| 79 | OES  | - | CTS  | - | CTS  | 169.03 | 108.3759 |
| 80 | OES  | - | CTS  | - | ON5P | 37.44  | 112.1882 |
| 83 | NH3L | - | CN8  | - | HN8  | 52.51  | 109.3850 |
| 84 | NH3L | - | CN8  | - | CN7  | 112.21 | 107.6019 |
| 85 | NH3L | - | CTS  | - | HAS  | 52.51  | 109.3850 |
| 86 | NH3L | - | CTS  | - | CTS  | 112.21 | 107.6019 |

DIHEDRAL ANGLE PARAMETERS

!V(dihedral) = Kc(1 + cos(n(chi) - delta))

!Kchi: kcal/mole

!n: multiplicity

!delta: degrees

| # | T   | O | R    | S | I    | O | N   | Kc   | n | delta  |
|---|-----|---|------|---|------|---|-----|------|---|--------|
| 1 | X   | - | CN8  | - | CN7  | - | X   | 0.20 | 3 | 0.0000 |
| 3 | X   | - | ON5P | - | CTS  | - | X   | 0.00 | 1 | 0.0000 |
| 4 | X   | - | NH3L | - | CN8  | - | X   | 0.10 | 3 | 0.0000 |
| 5 | X   | - | NH3L | - | CTS  | - | X   | 0.10 | 3 | 0.0000 |
| 6 | HN7 | - | CN7  | - | CN7  | - | HN7 | 0.20 | 3 | 0.0000 |
| 7 | HN7 | - | CN7B | - | CN7  | - | HN7 | 0.20 | 3 | 0.0000 |
| 8 | HN7 | - | CN7B | - | CN7B | - | HN7 | 0.00 | 3 | 0.0000 |

|     |      |   |      |   |      |   |      |       |    |          |
|-----|------|---|------|---|------|---|------|-------|----|----------|
| 9   | HN8  | - | CN8  | - | CN7  | - | HN7  | 0.20  | 3  | 0.0000   |
| 11  | HN8  | - | CN8B | - | CN7  | - | HN7  | 0.20  | 3  | 0.0000   |
| 14  | CN7  | - | CN7B | - | CN7B | - | HN7  | 0.20  | 3  | 0.0000   |
| 16  | CN7  | - | ON6B | - | CN7B | - | HN7  | 0.00  | 3  | 0.0000   |
| 17  | CN7B | - | CN7  | - | CN7  | - | HN7  | 0.20  | 3  | 0.0000   |
| 18  | CN7B | - | CN7B | - | CN7  | - | HN7  | 0.20  | 3  | 0.0000   |
| 20  | CN7B | - | ON6B | - | CN7  | - | HN7  | 0.20  | 3  | 0.0000   |
| 21  | CN7B | - | ON5P | - | CN8  | - | HN8  | 0.28  | 3  | 0.0000   |
| 23  | CN7B | - | CN7B | - | CN7  | - | CN7  | 0.00  | 6  | 0.0000   |
| 25  | CN7B | - | ON6B | - | CN7  | - | CN7  | 0.00  | 6  | 180.0000 |
| 26  | CN7B | - | ON5P | - | CN8  | - | CN7  | -0.85 | -1 | 0.0000   |
| 31  | CN8  | - | ON5P | - | CN7B | - | HN7  | 0.28  | 3  | 0.0000   |
| 32  | CN8  | - | ON5P | - | CN7B | - | CN7B | -0.85 | -1 | 0.0000   |
| 35  | CN8B | - | CN7  | - | CN7  | - | HN7  | 0.20  | 3  | 0.0000   |
| 40  | CN8B | - | CN7  | - | CN7  | - | CN7B | 0.20  | 4  | 180.0000 |
| 43  | ON5  | - | CN7B | - | CN7  | - | HN7  | 0.20  | 3  | 0.0000   |
| 44  | ON5  | - | CN7B | - | CN7B | - | HN7  | 0.00  | 3  | 0.0000   |
| 45  | ON5  | - | CN8B | - | CN7  | - | HN7  | 0.20  | 3  | 0.0000   |
| 49  | ON5  | - | CN7B | - | CN7  | - | CN7  | 0.00  | 3  | 0.0000   |
| 50  | ON5  | - | CN8B | - | CN7  | - | CN7  | 0.20  | -4 | 180.0000 |
| 58  | ON6B | - | CN7  | - | CN7  | - | HN7  | 0.20  | 3  | 180.0000 |
| 59  | ON6B | - | CN7B | - | CN7B | - | HN7  | 0.20  | 3  | 0.0000   |
| 60  | ON6B | - | CN7B | - | CN7B | - | CN7  | 0.40  | 6  | 0.0000   |
| 61  | ON6B | - | CN7  | - | CN7  | - | CN7B | 0.00  | 3  | 0.0000   |
| 67  | ON6B | - | CN7B | - | CN7B | - | ON5  | 0.00  | 3  | 0.0000   |
| 68  | HAS  | - | CTS  | - | CTS  | - | HAS  | 0.00  | -1 | 0.0000   |
| 71  | HOS  | - | OHS  | - | CTS  | - | HAS  | 0.00  | -1 | 0.0000   |
| 74  | CTS  | - | ON5P | - | CN7  | - | HN7  | 0.28  | 3  | 0.0000   |
| 75  | CTS  | - | ON5P | - | CN7  | - | CN7  | -0.85 | -1 | 0.0000   |
| 78  | CTS  | - | ON5P | - | CN7  | - | CN7B | -0.85 | -1 | 0.0000   |
| 81  | CTS  | - | ON5P | - | CN7  | - | CN8  | -0.85 | -1 | 0.0000   |
| 84  | CTS  | - | CTS  | - | CTS  | - | HAS  | 0.00  | -1 | 0.0000   |
| 87  | CTS  | - | OES  | - | CTS  | - | HAS  | 0.00  | -1 | 0.0000   |
| 90  | CTS  | - | CTS  | - | CTS  | - | CTS  | -1.07 | -1 | 0.0000   |
| 93  | CTS  | - | OES  | - | CTS  | - | CTS  | -0.85 | -1 | 0.0000   |
| 96  | ON5P | - | CN7  | - | CN7  | - | HN7  | 0.17  | 3  | 0.0000   |
| 97  | ON5P | - | CN7B | - | CN7B | - | HN7  | 0.17  | 3  | 0.0000   |
| 98  | ON5P | - | CN7B | - | CN7B | - | CN7  | -1.20 | -1 | 0.0000   |
| 101 | ON5P | - | CN7  | - | CN7  | - | CN8B | -1.20 | -1 | 0.0000   |
| 104 | ON5P | - | CN7B | - | CN7B | - | ON5  | -4.94 | -1 | 0.0000   |
| 107 | ON5P | - | CN7  | - | CN7  | - | ON6B | -4.94 | -1 | 0.0000   |
| 110 | ON5P | - | CTS  | - | CTS  | - | HAS  | 0.17  | 3  | 0.0000   |
| 111 | ON5P | - | CTS  | - | CTS  | - | CTS  | -1.20 | -1 | 0.0000   |
| 114 | OHS  | - | CTS  | - | CTS  | - | HAS  | 0.00  | -1 | 0.0000   |
| 117 | OHS  | - | CTS  | - | CTS  | - | CTS  | -1.91 | -1 | 0.0000   |
| 120 | OHS  | - | CTS  | - | CTS  | - | OHS  | -4.94 | -1 | 0.0000   |
| 123 | OES  | - | CTS  | - | CTS  | - | HAS  | 0.00  | -1 | 0.0000   |
| 126 | OES  | - | CTS  | - | CTS  | - | CTS  | -1.20 | -1 | 0.0000   |

|     |      |   |      |   |      |   |      |       |    |          |
|-----|------|---|------|---|------|---|------|-------|----|----------|
| 129 | OES  | - | CTS  | - | CTS  | - | OHS  | -3.80 | -1 | 0.0000   |
| 135 | NH3L | - | CN8  | - | CN7  | - | HN7  | 0.00  | -1 | 0.0000   |
| 138 | NH3L | - | CTS  | - | CTS  | - | HAS  | 0.00  | -1 | 0.0000   |
| 141 | NH3L | - | CTS  | - | CTS  | - | CTS  | -1.91 | -1 | 0.0000   |
| 144 | NH3L | - | CTS  | - | CTS  | - | ON5P | -4.94 | -1 | 0.0000   |
| 147 | NH3L | - | CTS  | - | CTS  | - | OHS  | -4.94 | -1 | 0.0000   |
| 150 | NH3L | - | CTS  | - | CTS  | - | OES  | -3.80 | -1 | 0.0000   |
| 154 | HN5  | - | ON5  | - | CN7B | - | HN7  | 0.00  | 3  | 0.0000   |
| 155 | HN5  | - | ON5P | - | CN7  | - | HN7  | 0.17  | 3  | 0.0000   |
| 156 | HN5  | - | ON5  | - | CN8B | - | HN8  | 0.00  | 3  | 0.0000   |
| 160 | HN5  | - | ON5  | - | CN7B | - | CN7  | 0.30  | -3 | 0.0000   |
| 162 | HN5  | - | ON5  | - | CN8B | - | CN7  | 1.33  | -1 | 0.0000   |
| 165 | HN7  | - | CN7B | - | CN7  | - | CN7  | 0.20  | 3  | 0.0000   |
| 167 | HN8  | - | CN8B | - | CN7  | - | CN7  | 0.20  | 3  | 0.0000   |
| 171 | HN5  | - | ON5  | - | CN7B | - | CN7B | 0.00  | -6 | 180.0000 |
| 177 | CN7  | - | ON6B | - | CN7B | - | CN7B | 0.00  | 6  | 0.0000   |
| 181 | HN5  | - | ON5P | - | CN7  | - | CN8  | 1.05  | -1 | 0.0000   |
| 187 | CN7B | - | ON6B | - | CN7  | - | CN8B | 2.00  | 3  | 0.0000   |
| 202 | HN8  | - | CN8B | - | CN7  | - | ON6B | 0.20  | 1  | 0.0000   |
| 203 | CN8  | - | ON5P | - | CN7B | - | ON6B | 0.19  | -1 | 0.0000   |
| 206 | ON5  | - | CN8B | - | CN7  | - | ON6B | 3.40  | 1  | 180.0000 |
| 207 | HOS  | - | OHS  | - | CTS  | - | CTS  | 1.05  | -1 | 0.0000   |
| 210 | HN7  | - | CN7B | - | CN7  | - | ON5P | 0.17  | 3  | 0.0000   |
| 211 | CN7  | - | ON6B | - | CN7B | - | ON5P | 0.19  | -1 | 0.0000   |
| 214 | CN7B | - | CN7B | - | CN7  | - | ON5P | -1.20 | -1 | 0.0000   |
| 217 | ON5  | - | CN7B | - | CN7  | - | ON5P | -4.94 | -1 | 0.0000   |
| 220 | CTS  | - | OES  | - | CTS  | - | ON5P | 0.19  | -1 | 0.0000   |

## References

- (1) Foloppe, N., MacKerell, A. *J. Comput. Chem.*, **2000** *21*, 86–104.
- (2) Banavali, N., MacKerell, A. *J. Comput. Chem.*, **2000** *21*, 105–120.
- (3) Frisch et al. Gaussian 03. Gaussian, Inc., Wallingford, CT, 2004.
- (4) Jorgensen, W. L., Chandrasekhar, J., Madura, J. D., Klein, M. L., Impey, R. W. *J. Chem. Phys.*, **1983** *79*, 926–935.
- (5) Phillips, J. C., Schulten, K., Braun, R., Wang, W., Gumbart, J., Tajkhorshid, E., Villa, E., Chipot, C., Skeel, R. D., Kalé, L. *J. Comput. Chem.*, **2005** *26*, 1781–1802. <http://www.ks.uiuc.edu/Research/namd>.
- (6) Darden, T., Perera, L., Li, L., Pedersen, L. *Structure*, **1999** *7*, R55–R60.
- (7) Ryckaert, J., Ciccotti, G., Berendsen, H. *J. Comput. Phys.*, **1977** *32*, 327–341.
- (8) Asensio, J. L., Hidalgo, A., Cuesta, I., González, C., Cañada, J., Vicent, C., Chiara, J. L., Cuevas, G., Jiménez-Barbero, J. *Chem. Eur. J.*, **2002** *8*, 5228–5240.
